# Supplementary material for: Pax2 coordinates epithelial morphogenesis and cell fate in the inner ear
Source: PubMed Central journal article supplement (PMC2946559; doi:10.1016/j.ydbio.2010.07.007), 2010-09-15
Supplement: mmc1.pdf [file mmc1.pdf]

**Consensus** G-GCATAACTAGCTAAAGAATTCACAAATGTTGGATAACCTCCAGCCCTCTGACTGTATGCAAAGCA--GGGGGCC TGAATGAGAGCATTGTGTTATAAAAACCTTAA-CTGGAGCAAGACT

**Pax2**  
TNGTCA<sup>C</sup><sub>T</sub>GCC<sup>A</sup><sub>G</sub>TGA  
**SoxB1**  
ATTGTG

CACAAAT  
**SoxB1**

**Human** GGGCATAACTAGCCAAAGAATTCACAAATGTTGGATAACCTCCAGCCCTCTGACTGTATGCAAAGTA--GGAGGCC TGAATGAGAGCATTGTGTTATAAAAACCTTAACTGGAGCAAGACT  
**Mouse** CAGCATAGCTGGCTAAAGAATTCACAAATGTTGGATAACCTCCAGCCCTCTGACTGTATGCAAAGCA--GGGGGCC TGAATGAGAGCATTGTGTTCTAAAACCTTAGGCTGGAGCAAGACT  
**Chick** GCG---AACCATCTTAAGGCTTTCTCAGTGTGAACAACCTCCGCCCTCCGACTGTATGCAAAGCGAGGGGGGCC TGAATAAGAGCATTGTGCTACAGGAGCTTACGTGGAGCAAGACT

**Consensus** -AA-AAGCCCAATCTCTCTGGTTATTTGGA-----CATTCAAATGCTGTC TAAGAGAAAAGAACTCATTATGACTCAGT TCCGTAAATTAGACGTAAAT TACCACTTTTGT---CC

**Gata**  
A<sup>A</sup><sub>T</sub>GATA<sup>A</sup><sub>G</sub>  
**SoxB1**  
ATTGTG

C<sup>T</sup><sub>T</sub>TATC<sup>T</sup><sub>A</sub>  
**Gata**

**Human** TAAAAGCCCAATCTCTCTGGTTATTTGGA-----CATTCAAATGCTGTC TAAGAGAAAAGAACTCATTATGACTCAGT TCCGTAAATTAGACGTAAAT TACCACTTTTGT---CT  
**Mouse** CAA-AAGCCCAATCTCTCTGGTTATTTGGA-----CATTCAAATGCTGTC TAAGAGAAAAGAACTCATTATGACTCAGT TCCGTAAATTAGAAGTAAAT TACCACTTTTGT---CC  
**Chick** -AG-AAGCCCAATTTTGTCTGGTTATTTGGAAATTTAGCATTCAAACCATGTC TGAAAAGAAAAGAACTCATTATGACTCAGT TCCGTAAATTAGACGTAAAT TACTGCTTTTGTAGTCCCC

**Consensus** AATACAAAAGGTAAGGGAACCTCTGCAAGACCAGAGGAT-CAGAAATCTAATGAGATGAGAGCATAGGCTGGAACGG-GGTGAACACAAGAACCCATTCAAC-AG-G-G---C-CC

**Gata**  
A<sup>A</sup><sub>T</sub>GATA<sup>A</sup><sub>G</sub>

TCA<sup>C</sup><sub>T</sub>GCC<sup>A</sup><sub>G</sub>TGACNA  
**Pax2**

CACAAAT  
**SoxB1**

**Human** GATACAAAAGGTAAGGGAACCTCTGCAAGACCAGAGGATCTGAAATCTAATGAGATGAGAGCATAGGCTGA- AACTG-AGTGAACACAAGAACCCATTCAAC TAGAGGCAAGCCC  
**Mouse** AATACAAAAGGTAAGGGAACCTCTGCAAGACCAGAGGATCTGAAATCTAATGAGATGAGAGCATAGGCTGGAACGG-GGTGAACACAAGAACCCATTCAAGAGGGAGGCCCTCC  
**Chick** AGCACAAGGTAAGGTAACAGGAGTTCTGCAAGACCAGAGGATCTGAAATCTAATGAGATGAGAGCATAGGCTGGAAGGGTGGGGGCACAAGGCCCATTTGAGCCCTCTGTGCACA

**Supplementary Figure 1. ClustalW alignment of human, mouse and chicken *N-Cadherin* En2-DP enhancer sequences.**

Shaded bases are conserved across all three species, as reflected in the consensus enhancer sequence. The consensus is annotated with putative conserved transcription factor binding sites: those above the consensus are encoded on the sense strand, whereas those below are encoded on the anti-sense strand. Shaded bases within the annotated binding sites are conserved across all three species. The lightly-shaded box indicates the position of a putative paired Pax2/SoxB1 recognition site, reminiscent of the chicken *delta-Crystallin* (DC5) and *Sox2* (N3) enhancers, which are synergistically activated by Pax6 and Sox2 in the lens placode.
